# Supplementary material
Source: publisher site journal article supplement (https://www.degruyterbrill.com/publication/journal_key/DZPH/downloadAsset/DZPH_Autorenhinweise.docx)
Supplement: Supplementary file 2 [file DZPH_Autorenhinweise.docx]

# ***Deutsche Zeitschrift für Philosophie***

**Autorenhinweise**

**1. Manuskriptabgabe**

- Das Dokument wird in einem satzfertigen Zustand benötigt, verfasst mit einer Standardtextverarbeitung (Microsoft Word, LibreOffice o.ä.).
- Enthält der Beitrag Abbildungen, wird von jeder Abbildung eine druckfähige Datei benötigt. Jede Abbildung dabei bitte in einer eigenen Datei speichern (siehe hierzu auch 4., „Tabellen und Abbildungen“).
- Von jedem Beitrag und von jeder Abbildung wird nur eine Version eingereicht, um Missverständnisse zu vermeiden.
- Das Manuskript bitte fortlaufend mit Seitenzahlen versehen.
- Keine Doppeleinreichung: Der Verfasser bestätigt schriftlich, dass der eingereichte Beitrag weder schon veröffentlicht noch gleichzeitig einer anderen Fachzeitschrift oder einem anderen Publikationsorgan angeboten wurde.
- Kontaktdaten: Es werden die vollständigen Kontaktdaten des Verfassers, inklusive Postadresse (bevorzugt Dienst- bzw. Hochschuladresse) benötigt.
- Bei Beiträgen mit mehreren Verfassern muss einer der Verfasser klar als Kontaktperson (Corresponding Author) hervorgehoben sein.
- Abstract: Jedem Beitrag wird ein Abstract in englischer Sprache beigefügt, das die zentralen Aussagen des Beitrags zusammenfasst und einen Umfang von 150 Wörtern nicht überschreitet. Das Abstract berichtet nicht (vage), wovon der Artikel handelt, sondern referiert prägnant den konkreten Inhalt, wobei keine über den Beitrag selbst hinausgehenden Informationen oder Wertungen mitgeteilt werden sollen. Die Sätze des Abstracts sollten klar strukturiert sein und keine überflüssigen Redewendungen enthalten.
- Keywords: Jeden Beitrag werden minimal fünf, maximal sieben englischsprachige Keywords beigefügt.
- Enthält der Beitrag Abbildungen, bitte von jeder Abbildung eine druckfähige Datei mitliefern; jede Abbildung dabei in einer eigenen Datei speichern (siehe hierzu auch 4., „Tabellen und Abbildungen“).

**2. Allgemeine Angaben**

- Sprache: Beiträge werden nur in deutscher, englischer oder französischer Sprache zur Begutachtung angenommen und nur in deutscher Sprache abgedruckt. Bei fremdsprachigen Beiträgen begrüßen wir es, wenn der Verfasser bereits bei Einreichung einen kompetenten Übersetzer vorschlägt.
- Rechtschreibung: Der Beitrag folgt einheitlich entweder der neuen deutschen Rechtschreibung nach dem aktuellen amtlichen Regelwerk oder der unreformierten Rechtschreibung nach der 20. Auflage des *Duden* („Einheitsduden“ 1991)*.* (Dies gilt auch für die Interpunktion (etwa für die Zeichensetzung am Ende von Zitaten.) Originalzitate werden in der Rechtschreibung der Quelle zitiert.
- Länge der Manuskripte: max. 40 000 Zeichen (inkl. Leerzeichen und Fußnoten), bei Beiträgen zu Themenschwerpunkten 30 000 Zeichen.
- Sonderzeichen (z.B. griechische, mathematische Zeichen) bitte mit einem Unicode-Font erfassen.
- Manuskripte bitte vor der Einreichung gründlich auf die Richtigkeit von Grammatik, Orthographie, Stilistik, Textformatierung etc. prüfen.
- Allgemeine Formatierungen, z.B. Schriftart [mit Ausnahme Sonderzeichen – siehe oben], Schriftgröße, Seitenformate etc.: Serifenschrift, linksbündig (kein Blocksatz), ohne manuelle oder automatische Silbentrennung. Überschriften müssen klar als solche erkennbar sein. Bitte keine unnötigen Formatierungen vornehmen.
- Anführungszeichen: Bitte typografische doppelte deutsche Anführungszeichen („ “) verwenden.
- Für Von-bis-Angaben (Seitenstrecken, Lebensdaten etc.) bitte den Halbgeviertstrich (–; unter Windows Strg+Minus auf dem Ziffernblock) verwenden.
- Bitte keine Fußnoten in Titel oder Untertitel des Textes.
- Überlange Absätze sollten vermieden werden, sie werden ggf. durch die Redaktion umbrochen.

Hervorhebungen im Text:

- kursiv: sprachliche Termini und eigene Hervorhebungen – diese bitte nur sparsam einsetzen.
- Weitere Hervorhebungen (fett, unterstrichen etc.) sollten vermieden und nur, wenn wissenschaftlich unbedingt notwendig, verwandt werden. So könnten z.B. bei Schriften zu Hegel ggf. Sperrdruck bzw. Unterstreichungen nötig sein.

Abkürzungen und Siglen:

- Nach Möglichkeit bitte nur die allgemeinsprachlichen Abkürzungen verwenden, im Deutschen nach dem Duden (z.B., u.a., etc.).
- Anführungszeichen: einheitlich deutsche Anführungszeichen verwenden.
- Zitate: in doppelte Anführungszeichen setzen, Zitate in Zitaten in einfache. Längere Zitate (ab drei Zeilen) werden als Blockzitat angegeben und mit je einer Leerzeile vom vorhergehenden und folgenden Absatz getrennt. Die Absätze werden eingerückt. Eingerückte Zitate werden nicht in Anführungszeichen gesetzt.
- Auslassungen in Zitaten durch drei in eckige Klammern gesetzte Auslassungspunkte kennzeichnen, die von dem vorangehenden und nachfolgenden Wort durch einen normalen Wortzwischenraum getrennt sind.

## **3. Verweise**

## Zitationen erfolgen in Fußnoten in folgendem Autor-Jahr-Format: Müller (1980), 56–57. Vgl. Meier (1982a), 59, u. ders. (1982b), 182–186. Ebd., 183–184.

## Bei Verweisen auf Seitenstrecken bitte immer Streckenstrich und zwei Seitenzahlen verwenden, auch wenn das Zitat nur über zwei Seiten reicht (also nicht f. verwenden). Verweise auf Seitenstrecken offener Länge mit ff. sollten vermieden werden.

## A.a.O. wird nicht verwendet, nur ders. und ebd. zur Wiederholung der unmittelbar vorausgehenden Quelle.

## Falls Quellen sehr oft zitiert werden, können Siglen genutzt und ggf. auch im laufenden Text verwandt werden.

## **4. Tabellen und Abbildungen**

## – Abbildungen und Tabellen bitte arabisch fortlaufend nummerieren. Die Zählung beginnt mit jedem Beitrag neu.

## Tabellen sollten ausschließlich mit dem internen Tabelleneditor des Textverarbeitungsprogramms erstellt werden.

## Abbildungen dürfen nicht im Text an der gewünschten Stelle mit ausgedruckt werden. An ihrer Stelle stehen eine für das gesamte Manuskript einheitliche Anweisung sowie die Abbildungslegende, z. B „hier [Abbildung x aus Abbildung_x.jpg] einfügen – [Abbildungslegende/-unterschrift]“

## Jede Abbildung liefern Sie bitte als separate Datei, versehen mit einem Verweis auf die gewünschte Einfügestelle im Manuskript. Bitte maximal eine Abbildung pro Seite. Bei Pixelgrafiken mit Tonabstufungen (Farbe oder Graustufen) ist eine Auflösung von 300 dpi in der gewünschten Bildgröße erforderlich, bei Pixelgrafiken ohne Tonabstufungenist eine Auflösung von 1200 dpi in der gewünschten Bildgröße erforderlich (Farbmodus:Bitmap). Musterdateien zur Prüfung der Abbildungsqualität sollten vorab an den Verlag gesendet werden.

## **5. Literaturverzeichnis**

Das Literaturverzeichnis bitte alphabetisch nach Autorname, Buchstabenkürzel des Vornamens/der Vornamen (jeweils nur ein Buchstabe)/evtl. 2. Autor (Jahr) ordnen. Bei Mehrfachnennungen eines Autors ist das Gliederungsprinzip das Erscheinungsjahr seines Titels. Bei Namensgleichheit mehrerer Autoren werden die Titel nach Nachname, Vorname, Erscheinungsjahr sortiert. Bei jahresgleichen Titeln eines Autors wird zur Identifikation a, b, c, ... angefügt:

Müller, A. (1979)
Müller, A. (1980a)
Müller, A. (1980b)
Müller, A., u. Maier, F. (2007)

### 5.1. Selbstständige Publikationen

#### 5.1.1. Monographien

Nachname, Buchstabenkürzel des Vornamens/der Vornamen (Erscheinungsjahr), Titel, Ort.

Bloch, E. (1947), Freiheit und Ordnung, Berlin.

#### 5.1.2. Herausgegebene Werke

Nachname, Buchstabenkürzel des Vornamens/der Vornamen (Hg.) (Erscheinungsjahr), Titel, Ort.

Weigand, K. (Hg.) (1955), Jean-Jacques Rousseau. Schriften zur Kulturkritik, Hamburg.

### 5.2. Schriften in Werkausgaben

Nachname, Buchstabenkürzel des Vornamens/der Vornamen (Jahr), Werk-/Aufsatztitel, in: Bandtitel [ggf. weitere bibliographische Angaben] Bandnummer, hg. v. Name, Buchstabenkürzel des Vornamens/der Vornamen, Ort, Seiten.

Besteht der gesamte Band aus nur einem Opus, entfällt die Bandangabe.

Kant, I. (1968), Kritik der reinen Vernunft [1. Aufl. 1781], in: Kants Werke 4, hg. v. d. Preuß. Akad. d. Wiss., Berlin u. New York, 1–252.

### 5.4. Aufsätze

#### 5.4.1. In herausgegebenen Werken

Nachname, Buchstabenkürzel des Vornamens/der Vornamen (Erscheinungsjahr), Titel, in: Nachname Herausgeber, Buchstabenkürzel des Vornamens/der Vornamen Herausgeber (Hg.), Titel des Buches, Ort, Seiten.

Lohmann, P. (2015), Konzepte des Selbstbewusstseins in Architekturtheorie und Philosophie. Die Fichte-Rezeption des frühen Schinkel, in: Gleiter, J. H., u. Schwarte, L. (Hg.), Architektur und Philosophie, Bielefeld, 151–161.

#### 5.4.2. In Periodika

Nachname, Buchstabenkürzel des Vornamens/der Vornamen (Erscheinungsjahr), Titel, in: Name der Zeitschrift Jahrgang[.ggf. Heftnummer], Seiten.

Habermas, J. (2010), Das Konzept der Menschenwürde und die realistische Utopie der Menschenrechte, in: Deutsche Zeitschrift für Philosophie 58.3, 343–375.

### 5.5. Internet

#### 5.5.1. Dokumente ohne DOI (Digital Object Identifier)

Nachname, Buchstabenkürzel des Vornamens/der Vornamen (Erscheinungsjahr), Titel, [weitere Angaben, z.B. Name der Zeitschrift, des Blogs etc.], Internetadresse, Datum des Abrufs.

Marx, K. (1845), Thesen über Feuerbach, in: Projekt Gutenberg-DE, http://gutenberg.spiegel.de/buch/-4982/1, besucht am 8.6.2015.

#### 5.5.2 Dokument aus Datenbank mit DOI

Nachname, Buchstabenkürzel des Vornamens/der Vornamen (Erscheinungsjahr), Titel, in: Titel der Datenbank (Erscheinungsjahr), Ort, DOI: DOI[, Datum des Abrufs].

Honneth, A. (2014), Die Normativität der Sittlichkeit. Hegels Lehre als Alternative zur Ethik Kants, in: Deutsche Zeitschrift für Philosophie Online, DOI: 10.1515/dzph-2014-0054, besucht am 8.6.2015.
